# Supplementary material
Source: HighWire-hosted journal article supplement (http://jnm-client.smart01.highwire.org/highwire/filestream/95129/field_highwire_adjunct_files/0/191031_Supplemental_Data.pdf)
Supplement: 191031_Supplemental_Data.pdf [file 191031_Supplemental_Data.pdf]

**Supplemental Table 1: PSMA-ligand positive non-PC lesions**

| <b>Organ system</b>                    | <b>Specific entities</b>                               | <b>References</b> |
|----------------------------------------|--------------------------------------------------------|-------------------|
| <b>Neuroectodermal tissue</b>          |                                                        |                   |
|                                        | Subcortical infarct                                    | (1,2)             |
|                                        | Meningioma                                             | (3,4)             |
|                                        | Schwannoma                                             | (5,6)             |
|                                        | Cervicothoracic (stellate), coeliac and sacral ganglia | (7,8)             |
| <b>Head and neck</b>                   |                                                        |                   |
|                                        | Benign thyroid nodule (follicular adenoma)             | (9-11)            |
|                                        | Thyroid cancer                                         | (12-15)           |
|                                        | Oro-pharyngeal squamous cell carcinoma                 | (16)              |
|                                        | Adenoid cystic carcinoma                               | (17)              |
| <b>Breast</b>                          |                                                        |                   |
|                                        | Breast carcinoma                                       | (18)              |
|                                        | Pseudoangiomatous stromal hyperplasia                  | (19)              |
| <b>Lungs and granulomatous disease</b> |                                                        |                   |
|                                        | Bronchiectasis and inflammatory disease                | (20)              |
|                                        | NSCLC                                                  | (21,22)           |
|                                        | Sarcoidosis                                            | (23-26)           |
|                                        | Wegener                                                | (27)              |
|                                        | Activated tuberculosis                                 | (22)              |
|                                        | Anthracosis                                            | (28)              |
| <b>Gastrointestinal</b>                |                                                        |                   |
|                                        | Pancreatic neuroendocrine tumor                        | (29)              |
|                                        | Pancreatic serous cystadenoma                          | (30)              |
|                                        | Hepatic capillary hemangioma                           | (31)              |
|                                        | Hepatocellular carcinoma                               | (32,33)           |
|                                        | Adrenal adenoma                                        | (34)              |
|                                        | Gastrointestinal stromal tumor                         | (35)              |
|                                        | Rectal carcinoma                                       | (36,37)           |
| <b>Genitourinary</b>                   |                                                        |                   |
|                                        | Renal cell carcinoma (different subtypes)              | (38-46)           |
|                                        | Urothelial carcinoma                                   | (47)              |
|                                        | Penile cancer                                          | (48)              |
| <b>Skeleton</b>                        |                                                        |                   |
|                                        | M. Paget                                               | (49-53)           |
|                                        | Acute/healing fracture                                 | (54,55)           |
| <b>Soft-tissue lesions</b>             |                                                        |                   |
|                                        | Dermafibroma                                           | (56)              |
|                                        | Nodular fasciitis                                      | (57)              |
|                                        | Desmoid tumor                                          | (58)              |
|                                        | Subcutaneous hemangioma                                | (59)              |
| <b>Systemic disease</b>                |                                                        |                   |
|                                        | Follicular lymphoma                                    | (60,61)           |
|                                        | Multiple myeloma                                       | (62)              |
|                                        | Amyloidosis                                            | (63)              |

1. Chan M, Hsiao E. Subacute Cortical Infarct Showing Uptake on 68Ga-PSMA PET/CT. *Clin Nucl Med*. 2017;42:110-111.
2. Noto B, Vrachimis A, Schafers M, et al. Subacute Stroke Mimicking Cerebral Metastasis in 68Ga-PSMA-HBED-CC PET/CT. *Clin Nucl Med*. 2016;41:e449-451.
3. Jain TK, Jois AG, Kumar VS, et al. Incidental detection of tracer avidity in meningioma in 68Ga-PSMA PET/CT during initial staging for prostate cancer. *Rev Esp Med Nucl Imagen Mol*. 2017.
4. Bilgin R, Ergul N, Cermik TF. Incidental Meningioma Mimicking Metastasis of Prostate Adenocarcinoma in 68Ga-Labeled PSMA Ligand PET/CT. *Clin Nucl Med*. 2016;41:956-958.
5. Kanthan GL, Izard MA, Emmett L, et al. Schwannoma Showing Avid Uptake on 68Ga-PSMA-HBED-CC PET/CT. *Clin Nucl Med*. 2016;41:703-704.
6. Rischpler C, Maurer T, Schwaiger M, et al. Intense PSMA-expression using (68)Ga-PSMA PET/CT in a paravertebral schwannoma mimicking prostate cancer metastasis. *Eur J Nucl Med Mol Imaging*. 2016;43:193-194.
7. Beheshti M, Rezaee A, Langsteger W. 68Ga-PSMA-HBED Uptake on Cervicothoracic (Stellate) Ganglia, a Common Pitfall on PET/CT. *Clin Nucl Med*. 2017;42:195-196.
8. Krohn T, Verburg FA, Pufe T, et al. [(68)Ga]PSMA-HBED uptake mimicking lymph node metastasis in coeliac ganglia: an important pitfall in clinical practice. *Eur J Nucl Med Mol Imaging*. 2015;42:210-214.
9. Derlin T, Kreipe HH, Schumacher U, et al. PSMA Expression in Tumor Neovasculature Endothelial Cells of Follicular Thyroid Adenoma as Identified by Molecular Imaging Using 68Ga-PSMA Ligand PET/CT. *Clin Nucl Med*. 2017;42:e173-e174.
10. Damle NA, Tripathi M, Chakraborty PS, et al. Unusual Uptake of Prostate Specific Tracer 68Ga-PSMA-HBED-CC in a Benign Thyroid Nodule. *Nucl Med Mol Imaging*. 2016;50:344-347.
11. Kanthan GL, Drummond J, Schembri GP, et al. Follicular Thyroid Adenoma Showing Avid Uptake on 68Ga PSMA-HBED-CC PET/CT. *Clin Nucl Med*. 2016;41:331-332.

12. Lutje S, Gomez B, Cohnen J, et al. Imaging of Prostate-Specific Membrane Antigen Expression in Metastatic Differentiated Thyroid Cancer Using 68Ga-HBED-CC-PSMA PET/CT. *Clin Nucl Med*. 2017;42:20-25.
13. Sager S, Vatankulu B, Uslu L, et al. Incidental Detection of Follicular Thyroid Carcinoma in 68Ga-PSMA PET/CT Imaging. *J Nucl Med Technol*. 2016;44:199-200.
14. Taywade SK, Damle NA, Bal C. PSMA Expression in Papillary Thyroid Carcinoma: Opening a New Horizon in Management of Thyroid Cancer? *Clin Nucl Med*. 2016;41:e263-265.
15. Verburg FA, Krohn T, Heinzl A, et al. First evidence of PSMA expression in differentiated thyroid cancer using [(6)(8)Ga]PSMA-HBED-CC PET/CT. *Eur J Nucl Med Mol Imaging*. 2015;42:1622-1623.
16. Lawhn-Heath C, Flavell RR, Glastonbury C, et al. Incidental Detection of Head and Neck Squamous Cell Carcinoma on 68Ga-PSMA-11 PET/CT. *Clin Nucl Med*. 2017.
17. Lutje S, Sauerwein W, Lauenstein T, et al. In Vivo Visualization of Prostate-Specific Membrane Antigen in Adenoid Cystic Carcinoma of the Salivary Gland. *Clin Nucl Med*. 2016;41:476-477.
18. Sathekge M, Lengana T, Modiselle M, et al. 68Ga-PSMA-HBED-CC PET imaging in breast carcinoma patients. *Eur J Nucl Med Mol Imaging*. 2017;44:689-694.
19. Malik D, Basher RK, Mittal BR, et al. 68Ga-PSMA Expression in Pseudoangiomatous Stromal Hyperplasia of the Breast. *Clin Nucl Med*. 2017;42:58-60.
20. Bouchelouche K, Vendelbo MH. Pulmonary Opacities and Bronchiectasis Avid on 68Ga-PSMA PET. *Clin Nucl Med*. 2017.
21. Shetty D, Loh H, Bui C, et al. Elevated 68Ga Prostate-Specific Membrane Antigen Activity in Metastatic Non-Small Cell Lung Cancer. *Clin Nucl Med*. 2016;41:414-416.
22. Pyka T, Weirich G, Einspieler I, et al. 68Ga-PSMA-HBED-CC PET for Differential Diagnosis of Suggestive Lung Lesions in Patients with Prostate Cancer. *J Nucl Med*. 2016;57:367-371.
23. Ardies PJ, Gykiere P, Goethals L, et al. PSMA Uptake in Mediastinal Sarcoidosis. *Clin Nucl Med*. 2017.

24. Dias AH, Holm Vendelbo M, Bouchelouche K. Prostate-Specific Membrane Antigen PET/CT: Uptake in Lymph Nodes With Active Sarcoidosis. *Clin Nucl Med*. 2017;42:e175-e176.
25. Hermann RM, Djannatian M, Czech N, et al. Prostate-Specific Membrane Antigen PET/CT: False-Positive Results due to Sarcoidosis? *Case Rep Oncol*. 2016;9:457-463.
26. Kobe C, Maintz D, Fischer T, et al. Prostate-Specific Membrane Antigen PET/CT in Splenic Sarcoidosis. *Clin Nucl Med*. 2015;40:897-898.
27. Prasad V, Steffen IG, Diederichs G, et al. Biodistribution of [(68)Ga]PSMA-HBED-CC in Patients with Prostate Cancer: Characterization of Uptake in Normal Organs and Tumour Lesions. *Mol Imaging Biol*. 2016;18:428-436.
28. Elri T, Aras M, Salihoglu YS, et al. A potential pitfall in the use of 68Ga-PSMA PET/CT: Anthracosis. *Rev Esp Med Nucl Imagen Mol*. 2017;36:65-66.
29. Vamadevan S, Shetty D, Le K, et al. Prostate-Specific Membrane Antigen (PSMA) Avid Pancreatic Neuroendocrine Tumor. *Clin Nucl Med*. 2016;41:804-806.
30. Chan M, Schembri GP, Hsiao E. Serous Cystadenoma of the Pancreas Showing Uptake on 68Ga PSMA PET/CT. *Clin Nucl Med*. 2017;42:56-57.
31. Bhardwaj H, Stephens M, Bhatt M, et al. Prostate-Specific Membrane Antigen PET/CT Findings for Hepatic Hemangioma. *Clin Nucl Med*. 2016;41:968-969.
32. Taneja S, Taneja R, Kashyap V, et al. 68Ga-PSMA Uptake in Hepatocellular Carcinoma. *Clin Nucl Med*. 2017;42:e69-e70.
33. Sasikumar A, Joy A, Nanabala R, et al. (68)Ga-PSMA PET/CT imaging in primary hepatocellular carcinoma. *Eur J Nucl Med Mol Imaging*. 2016;43:795-796.
34. Law WP, Fiumara F, Fong W, et al. Gallium-68 PSMA uptake in adrenal adenoma. *J Med Imaging Radiat Oncol*. 2016;60:514-517.
35. Noto B, Weckesser M, Buerke B, et al. Gastrointestinal Stromal Tumor Showing Intense Tracer Uptake on PSMA PET/CT. *Clin Nucl Med*. 2017;42:200-202.

36. Stoykow C, Huber-Schumacher S, Almanasreh N, et al. Strong PMSA Radioligand Uptake by Rectal Carcinoma: Who Put the "S" in PSMA? *Clin Nucl Med.* 2017;42:225-226.
37. Huang YT, Fong W, Thomas P. Rectal Carcinoma on 68Ga-PSMA PET/CT. *Clin Nucl Med.* 2016;41:e167-168.
38. Rhee H, Blazak J, Tham CM, et al. Pilot study: use of gallium-68 PSMA PET for detection of metastatic lesions in patients with renal tumour. *EJNMMI Res.* 2016;6:76.
39. Zacho HD, Nielsen JB, Dettmann K, et al. Incidental Detection of Thyroid Metastases From Renal Cell Carcinoma Using 68Ga-PSMA PET/CT to Assess Prostate Cancer Recurrence. *Clin Nucl Med.* 2017;42:221-222.
40. Sawicki LM, Buchbender C, Boos J, et al. Diagnostic potential of PET/CT using a 68Ga-labelled prostate-specific membrane antigen ligand in whole-body staging of renal cell carcinoma: initial experience. *Eur J Nucl Med Mol Imaging.* 2017;44:102-107.
41. Siva S, Callahan J, Pryor D, et al. Utility of 68 Ga prostate specific membrane antigen - positron emission tomography in diagnosis and response assessment of recurrent renal cell carcinoma. *J Med Imaging Radiat Oncol.* 2017.
42. Einspieler I, Tauber R, Maurer T, et al. 68Ga Prostate-Specific Membrane Antigen Uptake in Renal Cell Cancer Lymph Node Metastases. *Clin Nucl Med.* 2016;41:e261-262.
43. Demirci E, Ocak M, Kabasakal L, et al. (68)Ga-PSMA PET/CT imaging of metastatic clear cell renal cell carcinoma. *Eur J Nucl Med Mol Imaging.* 2014;41:1461-1462.
44. Gorin MA, Rowe SP, Hooper JE, et al. PSMA-Targeted 18F-DCFPyL PET/CT Imaging of Clear Cell Renal Cell Carcinoma: Results from a Rapid Autopsy. *Eur Urol.* 2017;71:145-146.
45. Rowe SP, Gorin MA, Hammers HJ, et al. Detection of 18F-FDG PET/CT Occult Lesions With 18F-DCFPyL PET/CT in a Patient With Metastatic Renal Cell Carcinoma. *Clin Nucl Med.* 2016;41:83-85.
46. Rowe SP, Gorin MA, Hammers HJ, et al. Imaging of metastatic clear cell renal cell carcinoma with PSMA-targeted (1)(8)F-DCFPyL PET/CT. *Ann Nucl Med.* 2015;29:877-882.

47. Gupta M, Choudhury PS, Gupta G, et al. Metastasis in urothelial carcinoma mimicking prostate cancer metastasis in Ga-68 prostate-specific membrane antigen positron emission tomography-computed tomography in a case of synchronous malignancy. *Indian J Nucl Med.* 2016;31:222-224.
48. Froehner M, Kuithan F, Zophel K, et al. Prostate-specific Membrane Antigen-targeted Ligand Positron Emission Tomography/Computed Tomography and Immunohistochemical Findings in a Patient With Synchronous Metastatic Penile and Prostate Cancer. *Urology.* 2017.
49. Bourgeois S, Gykiere P, Goethals L, et al. Aspecific Uptake of 68GA-PSMA in Paget Disease of the Bone. *Clin Nucl Med.* 2016;41:877-878.
50. Sasikumar A, Joy A, Nanabala R, et al. 68Ga-PSMA PET/CT False-Positive Tracer Uptake in Paget Disease. *Clin Nucl Med.* 2016;41:e454-455.
51. Blazak JK, Thomas P. Paget Disease: A Potential Pitfall in PSMA PET for Prostate Cancer. *Clin Nucl Med.* 2016;41:699-700.
52. Artigas C, Alexiou J, Garcia C, et al. Paget bone disease demonstrated on (68)Ga-PSMA ligand PET/CT. *Eur J Nucl Med Mol Imaging.* 2016;43:195-196.
53. Rowe SP, Deville C, Paller C, et al. Uptake of 18F-DCFPyL in Paget's Disease of Bone, an Important Potential Pitfall in Clinical Interpretation of PSMA PET Studies. *Tomography.* 2015;1:81-84.
54. Vamadevan S, Le K, Bui C, et al. Incidental PSMA Uptake in an Undisplaced Fracture of a Vertebral Body. *Clin Nucl Med.* 2017.
55. Gykiere P, Goethals L, Everaert H. Healing Sacral Fracture Masquerading as Metastatic Bone Disease on a 68Ga-PSMA PET/CT. *Clin Nucl Med.* 2016;41:e346-347.
56. Aydin F, Akcal A, Unal B, et al. 68 Ga-PSMA Uptake by Dermatofibroma in a Patient With Prostate Cancer. *Clin Nucl Med.* 2017.
57. Henninger M, Maurer T, Hacker C, et al. 68Ga-PSMA PET/MR Showing Intense PSMA Uptake in Nodular Fasciitis Mimicking Prostate Cancer Metastasis. *Clin Nucl Med.* 2016;41:e443-444.

58. Kanthan GL, Hsiao E, Kneebone A, et al. Desmoid Tumor Showing Intense Uptake on 68Ga PSMA-HBED-CC PET/CT. *Clin Nucl Med.* 2016;41:508-509.
59. Jochumsen MR, Vendelbo MH, Hoyer S, et al. Subcutaneous Lobular Capillary Hemangioma on 68Ga-PSMA PET/CT. *Clin Nucl Med.* 2017;42:e214-e215.
60. Vamadevan S, Le K, Bui C, et al. Prostate-Specific Membrane Antigen Uptake in Small Cleaved B-Cell Follicular Non-Hodgkin Lymphoma. *Clin Nucl Med.* 2016;41:980-981.
61. Kanthan GL, Coyle L, Kneebone A, et al. Follicular Lymphoma Showing Avid Uptake on 68Ga PSMA-HBED-CC PET/CT. *Clin Nucl Med.* 2016;41:500-501.
62. Sasikumar A, Joy A, Pillai MR, et al. 68Ga-PSMA PET/CT Imaging in Multiple Myeloma. *Clin Nucl Med.* 2017;42:e126-e127.
63. Stephens M, Kim DI, Shepherd B, et al. Intense Uptake in Amyloidosis of the Seminal Vesicles on 68Ga-PSMA PET Mimicking Locally Advanced Prostate Cancer. *Clin Nucl Med.* 2017;42:147-148.
